# Supplementary material
Source: PubMed Central journal article supplement (PMC7791605)
Supplement: NIHMS1655773-supplement-2.pdf [file NIHMS1655773-supplement-2.pdf]

**Supplemental Table 1**  
**Newcastle-Ottawa quality assessment for cohort and case control studies**

|                                                                                                                                                                                                                                                                                                                                                        |                                                                                                                                                                                                                                                                                                                                                   |
|--------------------------------------------------------------------------------------------------------------------------------------------------------------------------------------------------------------------------------------------------------------------------------------------------------------------------------------------------------|---------------------------------------------------------------------------------------------------------------------------------------------------------------------------------------------------------------------------------------------------------------------------------------------------------------------------------------------------|
| <p>Sabin (D:A:D) (2008)–cohort</p> <p>Selection</p> <p>1) A→1 star<br/>           2) A→1 star<br/>           3) A→1 star<br/>           4) A→1 star</p> <p>Comparability</p> <p>1) 2 stars (adjusted for age, gender)</p> <p>Outcome</p> <p>1) A→1 star<br/>           2) A→1 star (more than 2 years)<br/>           3) B→1 star</p> <p>Total 9/9</p> | <p>Brouwer (2014)–cohort</p> <p>Selection</p> <p>1) A→1 star<br/>           2) A→1 star<br/>           3) A→1 star<br/>           4) A→1 star</p> <p>Comparability</p> <p>1) 2 stars (adjusted for age, gender)</p> <p>Outcome</p> <p>1) B→1 star<br/>           2) B→no star (less than 2 years)<br/>           3) B→1 star</p> <p>Total 8/9</p> |
| <p>Lundgren (2008)–cohort</p> <p>Selection</p> <p>1) A→1 star<br/>           2) A→1 star<br/>           3) A→1 star<br/>           4) A→1 star</p> <p>Comparability</p> <p>1) 2 stars (adjusted for age, gender)</p> <p>Outcome</p> <p>1) A→1 star<br/>           2) A→1 star (more than 2 years)<br/>           3) D→no star</p> <p>Total 8/9</p>     | <p>Desai (2015)–cohort</p> <p>Selection</p> <p>1) B→1 star<br/>           2) A→1 star<br/>           3) A→1 star<br/>           4) A→1 star</p> <p>Comparability</p> <p>1) 2 stars (adjusted for age, gender)</p> <p>Outcome</p> <p>1) B→1 star<br/>           2) A→1 star (more than 2 years)<br/>           3) B→1 star</p> <p>Total 9/9</p>    |
| <p>Lang (2010)–case control</p> <p>Selection</p> <p>1) A→1 star<br/>           2) A→1 star<br/>           3) A→1 star<br/>           4) A→1 star</p> <p>Comparability</p> <p>1) 2 stars (matched for age, gender)</p> <p>Exposure</p> <p>1) A→1 star<br/>           2) A→1 star<br/>           3) A→1 star</p> <p>Total 9/9</p>                        | <p>Young (2015)–cohort</p> <p>Selection</p> <p>1) A→1 star<br/>           2) A→1 star<br/>           3) A→1 star<br/>           4) A→1 star</p> <p>Comparability</p> <p>1) 2 stars (adjusted for age, gender)</p> <p>Outcome</p> <p>1) B→1 star<br/>           2) A→1 star (more than 2 years)<br/>           3) B→1 star</p> <p>Total 9/9</p>    |
| <p>Obel (2010)–cohort</p> <p>Selection</p> <p>1) A→1 star<br/>           2) A→1 star<br/>           3) A→1 star<br/>           4) A→1 star</p> <p>Comparability</p> <p>1) 2 stars (adjusted for age, gender)</p> <p>Outcome</p> <p>1) B→1 star<br/>           2) A→1 star (more than 2 years)<br/>           3) A→1 star</p>                           | <p>Palella (2015)–cohort</p> <p>Selection</p> <p>1) A→1 star<br/>           2) A→1 star<br/>           3) A→1 star<br/>           4) A→1 star</p> <p>Comparability</p> <p>1) 2 stars (adjusted for age, gender)</p> <p>Outcome</p> <p>1) A→1 star<br/>           2) A→1 star (more than 2 years)<br/>           3) B→1 star</p>                   |

|                                                                                                                                                                                                                                                                                                          |                                                                                                                                                                                                                                                                                                                |
|----------------------------------------------------------------------------------------------------------------------------------------------------------------------------------------------------------------------------------------------------------------------------------------------------------|----------------------------------------------------------------------------------------------------------------------------------------------------------------------------------------------------------------------------------------------------------------------------------------------------------------|
| Total 9/9                                                                                                                                                                                                                                                                                                | Total 9/9                                                                                                                                                                                                                                                                                                      |
| <p>Choi (2011)–cohort</p> <p>Selection</p> <p>1) B→1 star</p> <p>2) A→1 star</p> <p>3) A→1 star</p> <p>4) A→1 star</p> <p>Comparability</p> <p>1) 2 stars (adjusted for age, gender)</p> <p>Outcome</p> <p>1) B→1 star</p> <p>2) A→1 star (more than 2 years)</p> <p>3) D→no star</p> <p>Total 8/9</p>   | <p>Marcus (2016)–cohort</p> <p>Selection</p> <p>1) A→1 star</p> <p>2) A→1 star</p> <p>3) A→1 star</p> <p>4) A→1 star</p> <p>Comparability</p> <p>1) 2 stars (adjusted for age, gender)</p> <p>Outcome</p> <p>1) A→1 star</p> <p>2) A→1 star (more than 2 years)</p> <p>3) B→1 star</p> <p>Total 9/9</p>        |
| <p>Bedimo (2011)–cohort</p> <p>Selection</p> <p>1) B→1 star</p> <p>2) A→1 star</p> <p>3) A→1 star</p> <p>4) A→1 star</p> <p>Comparability</p> <p>1) 0 stars (adjusted for age, gender)</p> <p>Outcome</p> <p>1) B→1 star</p> <p>2) A→1 star (more than 2 years)</p> <p>3) B→no star</p> <p>Total 6/9</p> | <p>Sabin (D:A:D) (2016)–cohort</p> <p>Selection</p> <p>1) A→1 star</p> <p>2) A→1 star</p> <p>3) A→1 star</p> <p>4) A→1 star</p> <p>Comparability</p> <p>1) 2 stars (adjusted for age, gender)</p> <p>Outcome</p> <p>1) A→1 star</p> <p>2) A→1 star (more than 2 years)</p> <p>3) B→1 star</p> <p>Total 9/9</p> |
| <p>Durand (2011)–case control</p> <p>Selection</p> <p>1) B→no star</p> <p>2) A→1 star</p> <p>3) A→1 star</p> <p>4) A→1 star</p> <p>Comparability</p> <p>1) 2 stars (matched for age, gender)</p> <p>Exposure</p> <p>1) A→1 star</p> <p>2) A→1 star</p> <p>3) A→1 star</p> <p>Total 8/9</p>               | <p>Dorjee (2017)–cohort</p> <p>Selection</p> <p>1) A→1 star</p> <p>2) A→1 star</p> <p>3) A→1 star</p> <p>4) A→1 star</p> <p>Comparability</p> <p>1) 2 stars (adjusted for age, gender)</p> <p>Outcome</p> <p>1) B→1 star</p> <p>2) A→1 star (more than 2 years)</p> <p>3) B→1 star</p> <p>Total 9/9</p>        |
| <p>Rotger (2013)–case control</p> <p>Selection</p> <p>1) A→1 star</p> <p>2) A→1 star</p> <p>3) A→1 star</p> <p>4) A→1 star</p> <p>Comparability</p> <p>1) 2 stars (matched for gender and age adjusted)</p> <p>Exposure</p> <p>1) A→1 star</p> <p>2) A→1 star</p> <p>3) A→1 star</p> <p>Total 9/9</p>    | <p>Elion (2018)–cohort</p> <p>Selection</p> <p>1) A→1 star</p> <p>2) A→1 star</p> <p>3) A→1 star</p> <p>4) A→1 star</p> <p>Comparability</p> <p>1) 2 stars (adjusted for age, gender)</p> <p>Outcome</p> <p>1) A→1 star</p> <p>2) A→1 star (more than 2 years)</p> <p>3) B→1 star</p> <p>Total 9/9</p>         |

Supplemental Table 2

Quality assessment of risk of bias for randomized control trial

| Trial         | Concealment of randomization | RCT stopped early | Patients blinded | Healthcare providers blinded | Data collectors blinded | Outcome assessors blinded |
|---------------|------------------------------|-------------------|------------------|------------------------------|-------------------------|---------------------------|
| Martin (2009) | No                           | No                | No               | No                           | No                      | Yes                       |
